# Supplementary material for: CD4+ T Lymphocyte Ablation Prevents Pancreatic Carcinogenesis in Mice
Source: Oxford University Press journal article supplement (doi:10.1158/2326-6066.cir-14-0016-t), 2014-02-11
Supplement: 23266066cir140016t-sup-figleg.pdf [file 23266066cir140016t-sup-figleg.pdf]

## Supplemental Figure legends

**Figure. S1.** CD4 deficiency prevents ADM/PanIN lesions progression over time. (A) Immunohistochemistry for p-ERK1/2, and Periodic Acid Schiff staining (inset); (B) Gomori Trichrome staining and (C) immunohistochemistry for SMA in iKras<sup>+</sup> and iKras<sup>+</sup>;CD4<sup>-/-</sup> pancreata 1 week, 3 weeks, 8 weeks and 17 weeks post pancreatitis induction. Scale bar 50µm.

**Figure. S2.** PanIN cells in CD4-deficient mice undergo apoptosis. (A) Cleaved caspase 3 immunohistochemistry staining and (B) TUNEL staining in iKras<sup>+</sup> and iKras<sup>+</sup>;CD4<sup>-/-</sup> pancreata 1 week, 3 weeks, 8 weeks and 17 weeks following pancreatitis. Scale bar 25µm.

**Figure. S3.** The process of tissue repair following pancreatitis induction is delayed in CD4<sup>-/-</sup> mice. (A) H&E and (B) CK19 immunohistochemistry staining of WT and CD4<sup>-/-</sup> pancreata at 0, 1 day, 1 week and 2 weeks following pancreatitis induction. Scale bar 50µm. Pancreatic immune cell infiltrates were measured by flow cytometry to determine the percentage of (C) CD3<sup>+</sup>CD4<sup>+</sup> T cells and CD3<sup>+</sup>CD4<sup>+</sup> FoxP3<sup>+</sup> Treg cells, (D) CD45<sup>+</sup> leukocytes, (E) CD3<sup>+</sup>CD8<sup>+</sup> T cells. Data represent mean ± SEM, each point indicates one animal. The statistical difference between WT and CD4<sup>-/-</sup> mice was determined by One-tailed Student's *t*-tests. \**p*<0.05, \*\**p*<0.01, \*\*\**p*<0.001, \*\*\*\**p*<0.0001.

**Figure. S4.** Cytokine expression is altered in CD4-deficient iKras<sup>+</sup> mice. (A) RT-qPCR for transgenic *Kras*<sup>+</sup>, *GM-CSF*, *Il1β*, *Il2*, *Il4*, *Il6*, *Il10*, *Il11*, *Il17* and *Il23p19* expression at 1 day following pancreatitis induction. (B) RT-qPCR for transgenic *Kras*<sup>+</sup>, *GM-CSF*, *Il1β*, *Il2*, *Il4*, *Il6*, *Il10*, *Il11* and *Il17* expression in control, iKras<sup>+</sup> and iKras<sup>+</sup>;CD4<sup>-/-</sup> pancreata 3

weeks, 8 weeks and 17 weeks following pancreatitis. Data represent mean  $\pm$  SEM, each point indicates one animal. The statistical difference between iKras<sup>\*</sup> and iKras<sup>\*</sup>;CD4<sup>-/-</sup> mice at the same time point was determined by Student's *t*-tests. \**p*<0.05, \*\**p*<0.01, \*\*\*\**p*<0.0001.
